# Supplementary material
Source: publisher figshare collection journal article supplement (https://rs.figshare.com/ndownloader/files/23382473)
Supplement: Supplementary file 1 [file 23382473]

ELECTRONIC SUPPLEMENTARY MATERIAL

Climate change mitigation potential of wetlands and the cost-effectiveness of their restoration

Pierre Taillardat1*, Benjamin S. Thompson2,3, Michelle Garneau1, Karelle Trottier1, Daniel A. Friess4

1Université du Québec à Montréal – Geotop, Canada

2Sydney Southeast Asia Centre, The University of Sydney, New South Wales, Australia

3School of Social Sciences, Monash University, Victoria, Australia

4Department of Geography, National University of Singapore, Singapore

*Corresponding author : [taillardat.pierre@courrier.uqam.ca](mailto:taillardat.pierre@courrier.uqam.ca)

**Contents**

| **Supplementary Method** | Page 2-5 |
| --- | --- |
| **Supplementary Table 1**  Summary of the references used for this meta-analysis, regarding the carbon budget and radiative effect of wetlands. | Page 6-10 |
|  |  |
| **Supplementary Table 2** Summary of the references used for this meta-analysis, regarding the cost-effectiveness of wetlands restoration. | Page 11 |
| **Supplementary Figure 1** Boxplots for mangrove and inland wetlands presenting (a) net ecosystem exchange (NEE); (b) aquatic exchange over NEE; (c) CH4 fluxes; (d) CO2:CH4 ratio (that sums all the CO2 and CH4 inputs and outputs) | Page 12 |
| **Supplementary References** | Page 13-17 |

**Methods**

We performed two systematic reviews, which were analysed through a meta-analysis; the first to determine wetland radiative effect and the second to determine wetland restoration costs. Both systematic reviews exclusively collected data published up until 31 March 2020, using the Scopus database by Elsevier.

We only used data reported in the peer-reviewed literature because this was the most robust way to control and standardise our search. Searches using grey literature (webpages, reports, conference proceedings, etc.) were not conducted because of uncertainties in quality, accessibility and achievability ([1](#_ENREF_1)). However, we acknowledge that this strict search criteria may omit some literature on restoration costs conducted by non-governmental organizations.

***1 Wetlands carbon budget and radiative effects***

*1.1 Literature search*

We conducted a systematic review of studies that quantified wetlands net carbon budget, including CH4 fluxes over an annual time scale (or growing season for >50° latitude studies). We first developed and tested a search string based on trial and error using a set known of relevant studies from three previously published literature reviews ([2-4](#_ENREF_2)). The search string was considered satisfactory when all the pre-selected studies appeared in our results. The search string used was: ["greenhouse gas" OR carbon OR methane OR CO2 OR CH4) AND (uptake OR flux OR emission OR sink OR source OR budget or sequestration OR storage OR balance OR exchange) AND (peatland OR tundra OR marsh OR mangrove OR floodplain OR fen OR bog)].

*1.2 Critical appraisal and data extraction*

The selected papers went through several rounds of quality control, conducted by two of the authors independently. First, titles (round 1) and abstracts (round 2) were screened. A keyword search approach was used. If none of the terms “carbon”, “CO2”, “methane”, “budget”, and an ecosystem name appeared, the publication was excluded. Selected papers were then downloaded and critically appraised using five questions to ensure consistency and relevance in our selection: Is the study site a natural, restored, or rewetted wetland ecosystem? Was CH4 measured? Was the study conducted over a complete annual timeframe or over the growing season for high latitude (>50°)? Was vegetation primary productivity considered in the budget? Were measurements taken directly in the field and not subject to any treatment that might affect the natural response of the system? Only papers in which the six answers were “yes” were considered for extraction. We highlight that studies on disturbed wetlands were not considered. Only studies from undisturbed and restored or rewetted peatlands were considered, in line with our stated research objectives.

For inclusion in this review, studies had to provide the wetland type description; GPS coordinates; study length duration; measurement technique and equipment used; time period since restoration or rewetted except for undisturbed sites; net ecosystem exchange (NEE) or net ecosystem productivity (NEP), terrestrial CH4 exchange, gross primary productivity (GPP), ecosystem respiration (Re), total organic carbon from rain (Rain TOC), aquatic carbon export including particulate organic carbon (POC), dissolved organic carbon (DOC), dissolved inorganic carbon (DIC), dissolved CO2 and CH4, aquatic CO2 evasion, terrestrial CH4 exchange, and aquatic CH4 evasion, when available. All these components are required to produce the net ecosystem carbon budget (NECB) as presented in ([5](#_ENREF_5)) and summarized in Figure 1. Because of the extensive work it represents to measure all the components required in this approach, almost no study has done so. Therefore, we adapted our selection as a compromise as such that NEE (or -NEP) and terrestrial CH4 exchange were the two mandatory variables required to include the study in our meta-analysis. Although not ideal, these two variables were enough to complete our research objective to estimate both NECB and ecosystem net radiative forcing (using SGWP and switchover time).

To clarify common confusion between terms, GPP represents the gross assimilation of CO2 via photosynthesis and NEE represents the net terrestrial carbon flux (Re-GPP). When negative, NEP would indicate a net uptake or storage of CO2 from the ecosystem. The only difference between NEE (=Re-GPP) and NEP (=GPP-Re) is the sign ([5](#_ENREF_5)). All NEP values were converted to NEE to ensure consistency between studies. Similarly, negative NECB indicates a net carbon sink and positive NECB a net carbon source towards the atmosphere (Fig. 1).

Studies were generally excluded during critical appraisal and data extraction if their metrics were incomplete or unclear, or if they extrapolated secondary data to their study sites from previously published sources. Studies where the conversion rate between years and sites was unclear were also removed. If individual annual carbon budgets were provided for an ecosystem over multiple years, all years were extracted first and averaged to only one annual carbon budget for our meta-analysis. As some research project have presented CO2 and CH4 results from the same site and period in independent papers, we checked for all the papers that only presented CH4 data to see if a companion paper existed. This was done by checking in the text if any reference were made to a related CO2 publication or if a following study was published and cited the initial paper.

*1.3 Calculations*

Data were extracted or converted in gram of carbon (gC.m-2.y-1) for consistency. Data units were then standardized to g.CO2.m-2.y-1, g.CH4.m-2.y-1,and in g.CO2.eq.m-2.y-1 at the 100 year time scale using the sustained global warming potential (SGWP) ratio of 45 between CH4 to CO2 ([6](#_ENREF_6)). Values standardized in kg.CO2 and kg.CH4 were used along with equations from ([6](#_ENREF_6)) to determine the ecosystem switchover time which indicates at what age does the ecosystem have a net negative radiative forcing.

***2 Wetland restoration costs***

*2.1 Literature search*

We conducted a systematic review of studies that reported wetland restoration costs. We used the search string, "cost*" AND "restor*” OR “rehab*” AND "ecosystem*", to capture all studies on rehabilitation and restoration. The broad term “ecosystem” was chosen for the same reasons as explained in Section 2.1.1; however, searches were repeated for "wetland*” and the individual wetland types and terminology variants to ensure all relevant peer-reviewed studies were captured.

*2.2 Critical appraisal and data extraction*

The titles and abstracts of collected articles were screened to remove studies that did not focus on wetland ecosystems (undefined ‘wetlands’ were also excluded). We then searched within individual studies and only included those that reported (1) restoration costs, (2) the size of the restored area, and (3) the duration of the restoration event[[1]](#footnote-1), for a specific restoration project or projects. Studies that reported actual costs from completed restoration projects, and those that estimated costs for planned restoration projects, were both included. If a study gave data on multiple restoration projects, data were extracted for each individual project. Care was taken not to double count individual sites that may have featured in multiple different articles.

*2.3 Calculations*

Calculations followed the methodology of ([7](#_ENREF_7)) and are summarised here. Total project costs[[2]](#footnote-2) were used, with most studies reporting these in US dollars. Costs reported in local currencies were converted to US dollars using the foreign exchange rates listed in the Penn World Tables ([8](#_ENREF_8)). When stated, the year of data collection was used, and if absent the publication year was used; for example, if a Canadian study published in 2008 collected data in 2004, then the CAD-USD exchange rate on 1 January 2004 was used. Once in US dollar format, costs were adjusted for inflation in each respective country by using the consumer price index (CPI), which resulted in all costs being standardised to US$ 2010 prices ([9](#_ENREF_9)). CPI data was extracted from The World Bank Development Indicators ([9](#_ENREF_9)).

Finally, costs were standardised to US$.ha-1.yr-1 format, based on the timeframes and spatial scale of restoration reported. Where discount rates were applied to cost data, the discount rate of zero was selected for inclusion, because this would be the case for all other data in which discount rates had not been applied (i.e. current prices). When multiple timeframes were modelled (e.g. data subjected to analyses running to both 2020 and 2050), the shortest / most recent timeframe was selected for inclusion, because shorter projections generally have less uncertainty. For each wetland type, the median cost was taken and reported along with the second and third quartiles, outliers, and the range, using boxplots. In a final stage, these cost data were combined with the data on wetlands carbon budgets and radiative effects, to calculate the cost-effectiveness of wetland restoration for climate change mitigation.

Supplementary Table 1: Summary of the references used for this meta-analysis, regarding the carbon budget and radiative effect of wetlands. “SGWP 100y“ stands for Sustained Global Warming Potential at the 100 year horizon, “NECB“ for the net ecosystem carbon budget, “NEP“ for net ecosystem production, “TOC“ for total organic carbon, “EC-GF“ for Eddy Covariance with Gap Filled data, “EC- no GF“ for Eddy Covariance with no Gap Filled data, “MC“ for manual chambers. Values are presented, when available, as mean of the total annual measurements ± standard error.

| **Wetland type** | **Lat,**  **Long** | **Measurement (study len**  **gth)** | **Switchover time** | **SGWP 100y** | **NECB** | **NEP  (Re-GPP)** | **Aquatic exchange** | **CH4 flux** | **Rain TOC** | **Ref.** |
| --- | --- | --- | --- | --- | --- | --- | --- | --- | --- | --- |
|  |  |  | **years** | **gCO2eq m-2 y-1** | **gC m-2 y-1** | **gC m-2 y-1** | **gC m-2 y-1** | **gC m-2 y-1** | **gC m-2 y-1** |  |
| Mangrove | Global | Global Review | 0 | -776.5 | -233 | -1145.5 | 856 | 1.5 | NA | ([10](#_ENREF_10)) |
| Saltmarsh | 29.5 N,  90.3 W | EC-GF  (annual) | NA | 1246.6 | 181 | 170.6 | NA | 10.4 | NA | ([11](#_ENREF_11), [12](#_ENREF_12)) |
| Saltmarsh | 31.5N,  122 E | EC-GF  (annual) | 17 | -1284.7 | -620 | -637.6 | NA | 17.6 | NA | ([13](#_ENREF_13)) |
| Freshwater marsh | 25.8 N,  81.1 W | EC-GF  (annual) | 0 | -2912 | -978 | -990 | NA | 12 | NA | ([14](#_ENREF_14)) |
| Freshwater marsh | 29.9 N,  90.3 E | EC-GF (annual) | 317.3 | 1567.7 | -290.2 | -337 | NA | 50.8 | NA | ([11](#_ENREF_11), [12](#_ENREF_12)) |
| Freshwater marsh | 30.5 N,  84.2 W | MC  (Xannual) | 153.6  ±42.9 | 1249.2  ±498.0 | -957.6  ±13.3 | -1042  ±5.3 | NA | 84.8  ±8.0 | NA | ([15](#_ENREF_15)) |
| Freshwater marsh | 31.3 N,  81.4 W | EC-GF (annual) | 925.2 | 5473.4 | -254 | -368 | NA | 114 | NA | ([16](#_ENREF_16)) |
| Freshwater marsh | 37.00 N,  76.5 W | MC  (annual) | 363.4 | 2282.7 | -347.7 | -411.1 | NA | 63.3 | NA | ([15](#_ENREF_15)) |
| Freshwater marsh | 41.5 N,  82.9 W | EC-GF (Xannual) | NA | 3034  ±242.5 | 42.7  ±32.8 | 14.5  ±29.0 | -22.7  ±2.2 | 50.8  ±2.3 | NA | ([17](#_ENREF_17)) |
| Freshwater marsh | 45.4 N,  75.5 W | EC-GF (annual) | 2037.6 | 6779.6 | -97 | -224 | NA | 127 | NA | ([18](#_ENREF_18)) |
| Freshwater marsh | 47.6 N,  133.5 E | EC-GF [CO2]; MC [CH4] (Xannual) | 1142.0  ±207.9 | 2086.1  ±81.1 | -79.2  ±15.6 | -121.5  ±15.2 | NA | 42.3  ±0.42 | NA | ([19](#_ENREF_19)) |
| Tropical Peat Swamp | 1.4 N,  111.4 E | EC-GF (annual) | 25.6 | -249.1 | -131.7 | -136 | NA | 4.2 | NA | ([20](#_ENREF_20), [21](#_ENREF_21)) |
| Tropical Peat Swamp | 2.3 N,  113.9 E | EC-GF (annual) | NA | 646.1 | -174.1 | 174 | NA | 0.1 | NA | ([22](#_ENREF_22), [23](#_ENREF_23)) |
| Floodplain | 16.5 N,  56.4 W | EC-GF (annual) | 255.8 | 549.7 | -141.2 | -161 | 0.8 | 19 | NA | ([24](#_ENREF_24)) |
| Tundra | 63.9 N,  149.2 W | EC-GF (annual) | NA | 118.4 | 13.9 | 12.7 | NA | 1.2 | NA | ([25](#_ENREF_25)) |
| Tundra | 69.6 N,  161.3 E | EC-GF [CO2]; MC [CH4] (Xannual) | NA | 942.7  ±153.3 | 9.65  ±7.6 | -6.5  ±7.8 | NA | 16.2  ±2.6 | NA | ([26](#_ENREF_26)) |
| Tundra | 70.8 N,  147.5 W | EC-GF (annual) | NA | 118.4 | 13.9 | 12.7 | NA | 2.2 | NA | ([27](#_ENREF_27)) |
| Tundra | 71.3 N, 156.6 W | EC-GF (seasonal) | 232 | 44.2 | -13.3 | -14.9 | NA | 1.6 | NA | ([28](#_ENREF_28)) |
| Tundra | 74.4 N, 136.3 E | EC-GF (annual) | 56.8 | -75.5 | -68.9 | -72 | NA | 3.2 | NA | ([29](#_ENREF_29), [30](#_ENREF_30)) |
| Tundra | 74.5 N,  20.6 W | EC-GF [CO2]; MC [CH4] (Xannual) | 4614  ±3079 | 315.8  ±88.5 | -21.9  ±18.2 | -28.9  ±17.8 | NA | 7.1  ±0.4 | NA | ([31](#_ENREF_31)) |
| Tundra | 74.8 N,  147.5 W | EC-GF [CO2]; EC-no GF [CH4] (Xannual) | 16.2  ±5.6 | -192.3  ±21.0 | -86.4  ±2.4 | -88.7  ±2.2 | NA | 2.2  ±0.2 | NA | ([32](#_ENREF_32), [33](#_ENREF_33)) |
| Peatland (bog) | 37.4 S,  175.6 E | EC-GF (Xannual) | 166.9  ±45.5 | 276.4  ±194.0 | -176.3  ±43.3 | -205.1  ±45.4 | 12.4  ±0.5 | 16.4  ±3.7 | NA | ([34](#_ENREF_34)) |
| Peatland (bog) | 43.3 N, 114.8 E | EC-GF (Xannual) | 287.8  ±30.3 | 470.9  ±40.8 | -130.1  ±15.7 | -147  ±16.2 | NA | 16.9  ±0.7 | NA | ([35](#_ENREF_35)) |
| Peatland (bog) | 45.41 N,  75.48 W | EC-GF (annual) | 337.8 | 128.7 | -21.6 | -40.2 | 14.9 | 3.7 | NA | ([36](#_ENREF_36)) |
| Peatland (bog) | 47.5 N, 93.5 W | EC-GF (Xannual) | 1572.3  ±239.6 | 846.2  ±144.5 | -19  ±2.3 | -35.3  ±2.2 | NA | 16.3  ±2.5 | NA | ([37](#_ENREF_37)) |
| Peatland (bog) | 47.6 N,  14.3 E | EC-GF (Xannual) | 280.9  ±126.6 | 90.5  ±60.0 | -49.2  ±20.9 | -54.0  ±21.2 | NA | 4.8  ±0.3 | NA | ([38](#_ENREF_38)) |
| Peatland (bog) | 47.8 N,  11.3 E | EC-GF (annual) | 161 | 89.9 | -56.7 | -62 | NA | 5.3 | NA | ([39](#_ENREF_39)) |
| Peatland (bog) | 48.0 N,  11.3 W | MC (annual) | NA | 1290.1 | 250.7 | 244.1 | NA | 6.6 | NA | ([40](#_ENREF_40)) |
| Peatland (bog) | 48.3 N,  58.7 W | EC-GF (Xannual) | NA | -103.2  ±213.7 | -78.7  ±60.7 | -82  ±60.8 | NA | 3.3  ±0.2 | NA | ([41](#_ENREF_41)) |
| Peatland (bog) | 48.4 N,  11.7 E | EC-GF (seasonal) | 8969 | 217.1 | 1.8 | -1.9 | NA | 3.7 | NA | ([42](#_ENREF_42)) |
| Peatland (bog) | 49.1 N,  123.0 W | EC-GF (annual) | 911 | 612.4 | -29.1 | -103.7 | 62.6 | 12 | NA | ([43](#_ENREF_43)) |
| Peatland (bog) | 51.9 N,  10.0 W | EC-GF (Xannual) | NA | 118.5  ±20.4 | -29.8  ±5.1 | -47.8  ±5.0 | 14.0  ±0.3 | 4.1  ±0.1 | NA | ([44](#_ENREF_44)) |
| Peatland (bog) | 53.7 N,  8.8 E | EC-GF (Xannual) | 4532  ±3137 | 122  ±88.4 | -15.2  ±12.2 | -18.4  ±11.5 | NA | 3.2  ±0.8 | NA | ([45](#_ENREF_45)) |
| Peatland (bog) | 55.8 N,  3.2 W | EC-GF (annual) | NA | 260.5 | 8.2 | -27.8 | 35 | 4.1 | -3.1 | ([46](#_ENREF_46)) |
| Peatland (bog) | 58.4 N,  4.0 W | EC-GF [CO2]; MC [CH4] (annual) | 51.8 | -122.1 | -99.7 | -114 | 10 | 4.3 | NA | ([47](#_ENREF_47)) |
| Peatland (bog) | 62.8 N,  30.9 E | MC (annual) | NA | 498.69 | 90 | 80 | 7 | 3 | NA | ([48](#_ENREF_48)) |
| Peatland (bog) | 63.7N,  20.1 E | MC (Xannual) | >20,000 | 235  ±8.5 | 2.8  ±3.4 | -6.6  ±2.6 | NA | 4  ±0.1 | NA | ([49](#_ENREF_49)) |
| Peatland (fen) | 46.0 N,  11.0 E | EC-GF (annual) | NA | 854.1 | 183.9 | 180.7 | NA | 3.2 | NA | ([50](#_ENREF_50)) |
| Peatland (fen) | 52.1 N, 5.0 E | EC-GF [CO2]; MC [CH4] (annual) | 236 | 893.4 | -262 | -311 | 21.4 | 27.6 | NA | ([51](#_ENREF_51)) |
| Peatland (fen) | 52.3 N,  0.3 E | EC-GF [CO2]; MC [CH4] (annual) | 138.2 | 105.6 | -100.4 | -119 | 4.2 | 8.8 | NA | ([52](#_ENREF_52)) |
| Peatland (fen) | 54.0 N,  113.0 W | MC (Xannual) | 399.5  ±34.1 | 1521.8  ±125.1 | -231.8  ±41.8 | -274.0  ±46.6 | NA | 42.2  ±4.9 | NA | ([15](#_ENREF_15), [53](#_ENREF_53), [54](#_ENREF_54)) |
| Peatland (fen) | 54.1 N,  72.5 W | MC (annual) | NA | 729.2 | 86.2 | 78.9 | NA | 7.4 | NA | ([53](#_ENREF_53), [54](#_ENREF_54)) |
| Peatland (fen) | 55.6 N,  22.8 W | EC-GF (annual) | 174.3  ±32.7 | 332.5  ±10.6 | -191.5  ±76.2 | -210  ±80.6 | NA | 18.5  ±4.9 | NA | ([55](#_ENREF_55)) |
| Peatland (fen) | 58.7 N,  93.8 W | EC-GF (annual) | 5133 | 245 | -1 | -5.4 | NA | 4.4 | NA | ([56](#_ENREF_56)) |
| Peatland (fen) | 61.8 N,  24.2 W | EC-GF (annual) | 424.1 | 370.6 | -43.9 | -53.4 | NA | 9.5 | NA | ([57](#_ENREF_57)) |
| Peatland (fen) | 62.8 N,  31.0 E | EC-GF (Xannual) | 30.3  ±60.9 | -195.2  ±47.2 | -111.9  ±37.3 | -123.6  ±43.9 | 7.8  ±5.0 | 3.8  ±1.6 | NA | ([58](#_ENREF_58)) |
| Peatland (fen) | 64.2 N,  19.6 E | EC-GF [CO2]; MC [CH4] (Xannual) | 1011.1  ±448.8 | 559.8  ±215.5 | -23.6  ±4.6 | -51.5  ±4.9 | 17.8  ±3.7 | 11.5  ±3.5 | -4.8 | ([59](#_ENREF_59)) |
| Peatland (fen) | 68.0 N,  24.2 E | EC-GF [CO2]; MC [CH4] (annual) | NA | 899.9 | 15 | 0 | NA | 15 | NA | ([60](#_ENREF_60)) |
| Peatland (fen) | 68.4 N,  19.0 E | EC-GF (Xannual) | 790  ±60.2 | 947  ±30.9 | -57.3  ±3.9 | -77.9  ±3.9 | NA | 20.6  ±0.5 | NA | ([40](#_ENREF_40), [61](#_ENREF_61), [62](#_ENREF_62)) |
| Peatland (fen) | 68.8 N,  161.5 E | EC-GF (Xannual) | 4255 | 263.8  ±0.7 | -6.95  ±16.6 | -12.1  ±17.7 | NA | 5.15  ±1.1 | NA | ([43](#_ENREF_43), [63](#_ENREF_63)) |
| Peatland (fen) | 69.2 N,  27.3 E | MC (annual) | 781.2 | 473.7 | -27.1 | -37.3 | NA | 10.2 | NA | ([64](#_ENREF_64)) |
| Peatland (fen) | 74.5 N,  21.0 E | EC-no GF (seasonal) | 5133 | 24315 | 7.3 | -35.2 | NA | 42.5 | NA | ([65](#_ENREF_65)) |
| Restored Peatland  [2013] | 38.1 N,  121.6 W | EC-GF (Xannual)  [2014, 2015, 2016, 2017] | 198.6 | 596.8  ±923.6 | -365.3  ±345.3 | 399.8  ±355.2 | NA | 34.5  ±14.2 | NA | ([4](#_ENREF_4), [66](#_ENREF_66)) |
| Restored Peatland  [2000] | 48.0 N,  69.0 W | EC-GF (Xannual)  [2013-2016] | 78.6 | -41.4 | -78.7 | -90 | 6.9 | 4.4 | NA | ([67](#_ENREF_67)) |
| Restored Peatland  [1998] | 52.9 N,  2.8 W | EC-GF (annual)  [2015] | 57.4 | -66.9 | -61.8 | -64.6 | NA | 2.8 | NA | ([68](#_ENREF_68)) |
| Restored Peatland  [2009] | 52.9 N,  2.8 W | EC-GF (annual)  [2015] | 260.0 | 148.8 | -36.9 | -42 | NA | 5.1 | NA | ([68](#_ENREF_68)) |
| Restored Peatland  [2008] | 55.3 N,  112.5 W | MC (seasonal)  [2011-2012] | 268 | 111.4 | -26.3 | -30 | NA | 3.7 | NA | ([69](#_ENREF_69)) |
| Rewetted Peatland  [1995] | 52.3 N,  0.3 E | EC  (annual)  [2013,2014,  2015] | NA | 487 | 132.8 | -123 | NA | 0 | NA | ([52](#_ENREF_52)) |
| Rewetted Peatland  [1984] | 53.0 N,  7.5 E | MC (annual)  [2010,2011] | 0 | 549.8 | -57.6 | -71.4 | NA | 13.9 | NA | ([70](#_ENREF_70)) |
| Rewetted Peatland  [2005] | 53.0 N,  7.5 E | MC (annual)  [2010,2011] | 6.3 | -232.5 | -96.4 | -98.7 | NA | 2.4 | NA | ([70](#_ENREF_70)) |
| Rewetted Peatland  [2013] | 53.0 N,  8.0 W | MC (annual)  [2014-2015] | NA | 1499.7 | 361.5 | 358.5 | NA | 3.1 | NA |  |
| Rewetted Peatland  [2002] | 55.2 N,  9.6 W | MC (annual)  [2008-2013] | 164 | 157.3 | -95 | -104 | NA | 9 | NA | ([71](#_ENREF_71)) |
| Restored FW marsh  [2010] | 38.0 N,  121.8 W | EC-GF (Xannual)  [2011, 2012, 2013, 2015, 2016, 2017] | 286.2 | 2275.5  ±908.9 | -183.3  ±205.7 | -235.8  ±208 | NA | 52.5  ±11.6 | NA | ([4](#_ENREF_4), [66](#_ENREF_66)) |
| Restored FW marsh  [1997] | 38.1 N,  121.6 W | EC-GF (Xannual)  [2012-2017] | 299.4  ±259.6 | 1037.1  ±1226.8 | -404.5  ±213.5 | -449.4  ±206.0 | NA | 44.9  ±8.5 | NA | ([4](#_ENREF_4)) |
| Restored FW marsh  [2002] | 55.9 N,  8.4 E | EC-GF (annual)  [2009-2011] | 266 | 184.4 | -207.8 | -142.3 | NA | 10.5 | NA | ([72](#_ENREF_72)) |

Supplementary Table 2: Summary of the references used for this meta-analysis, regarding the cost-effectiveness of wetlands restoration.

Please see the associated Excel Spreadsheet


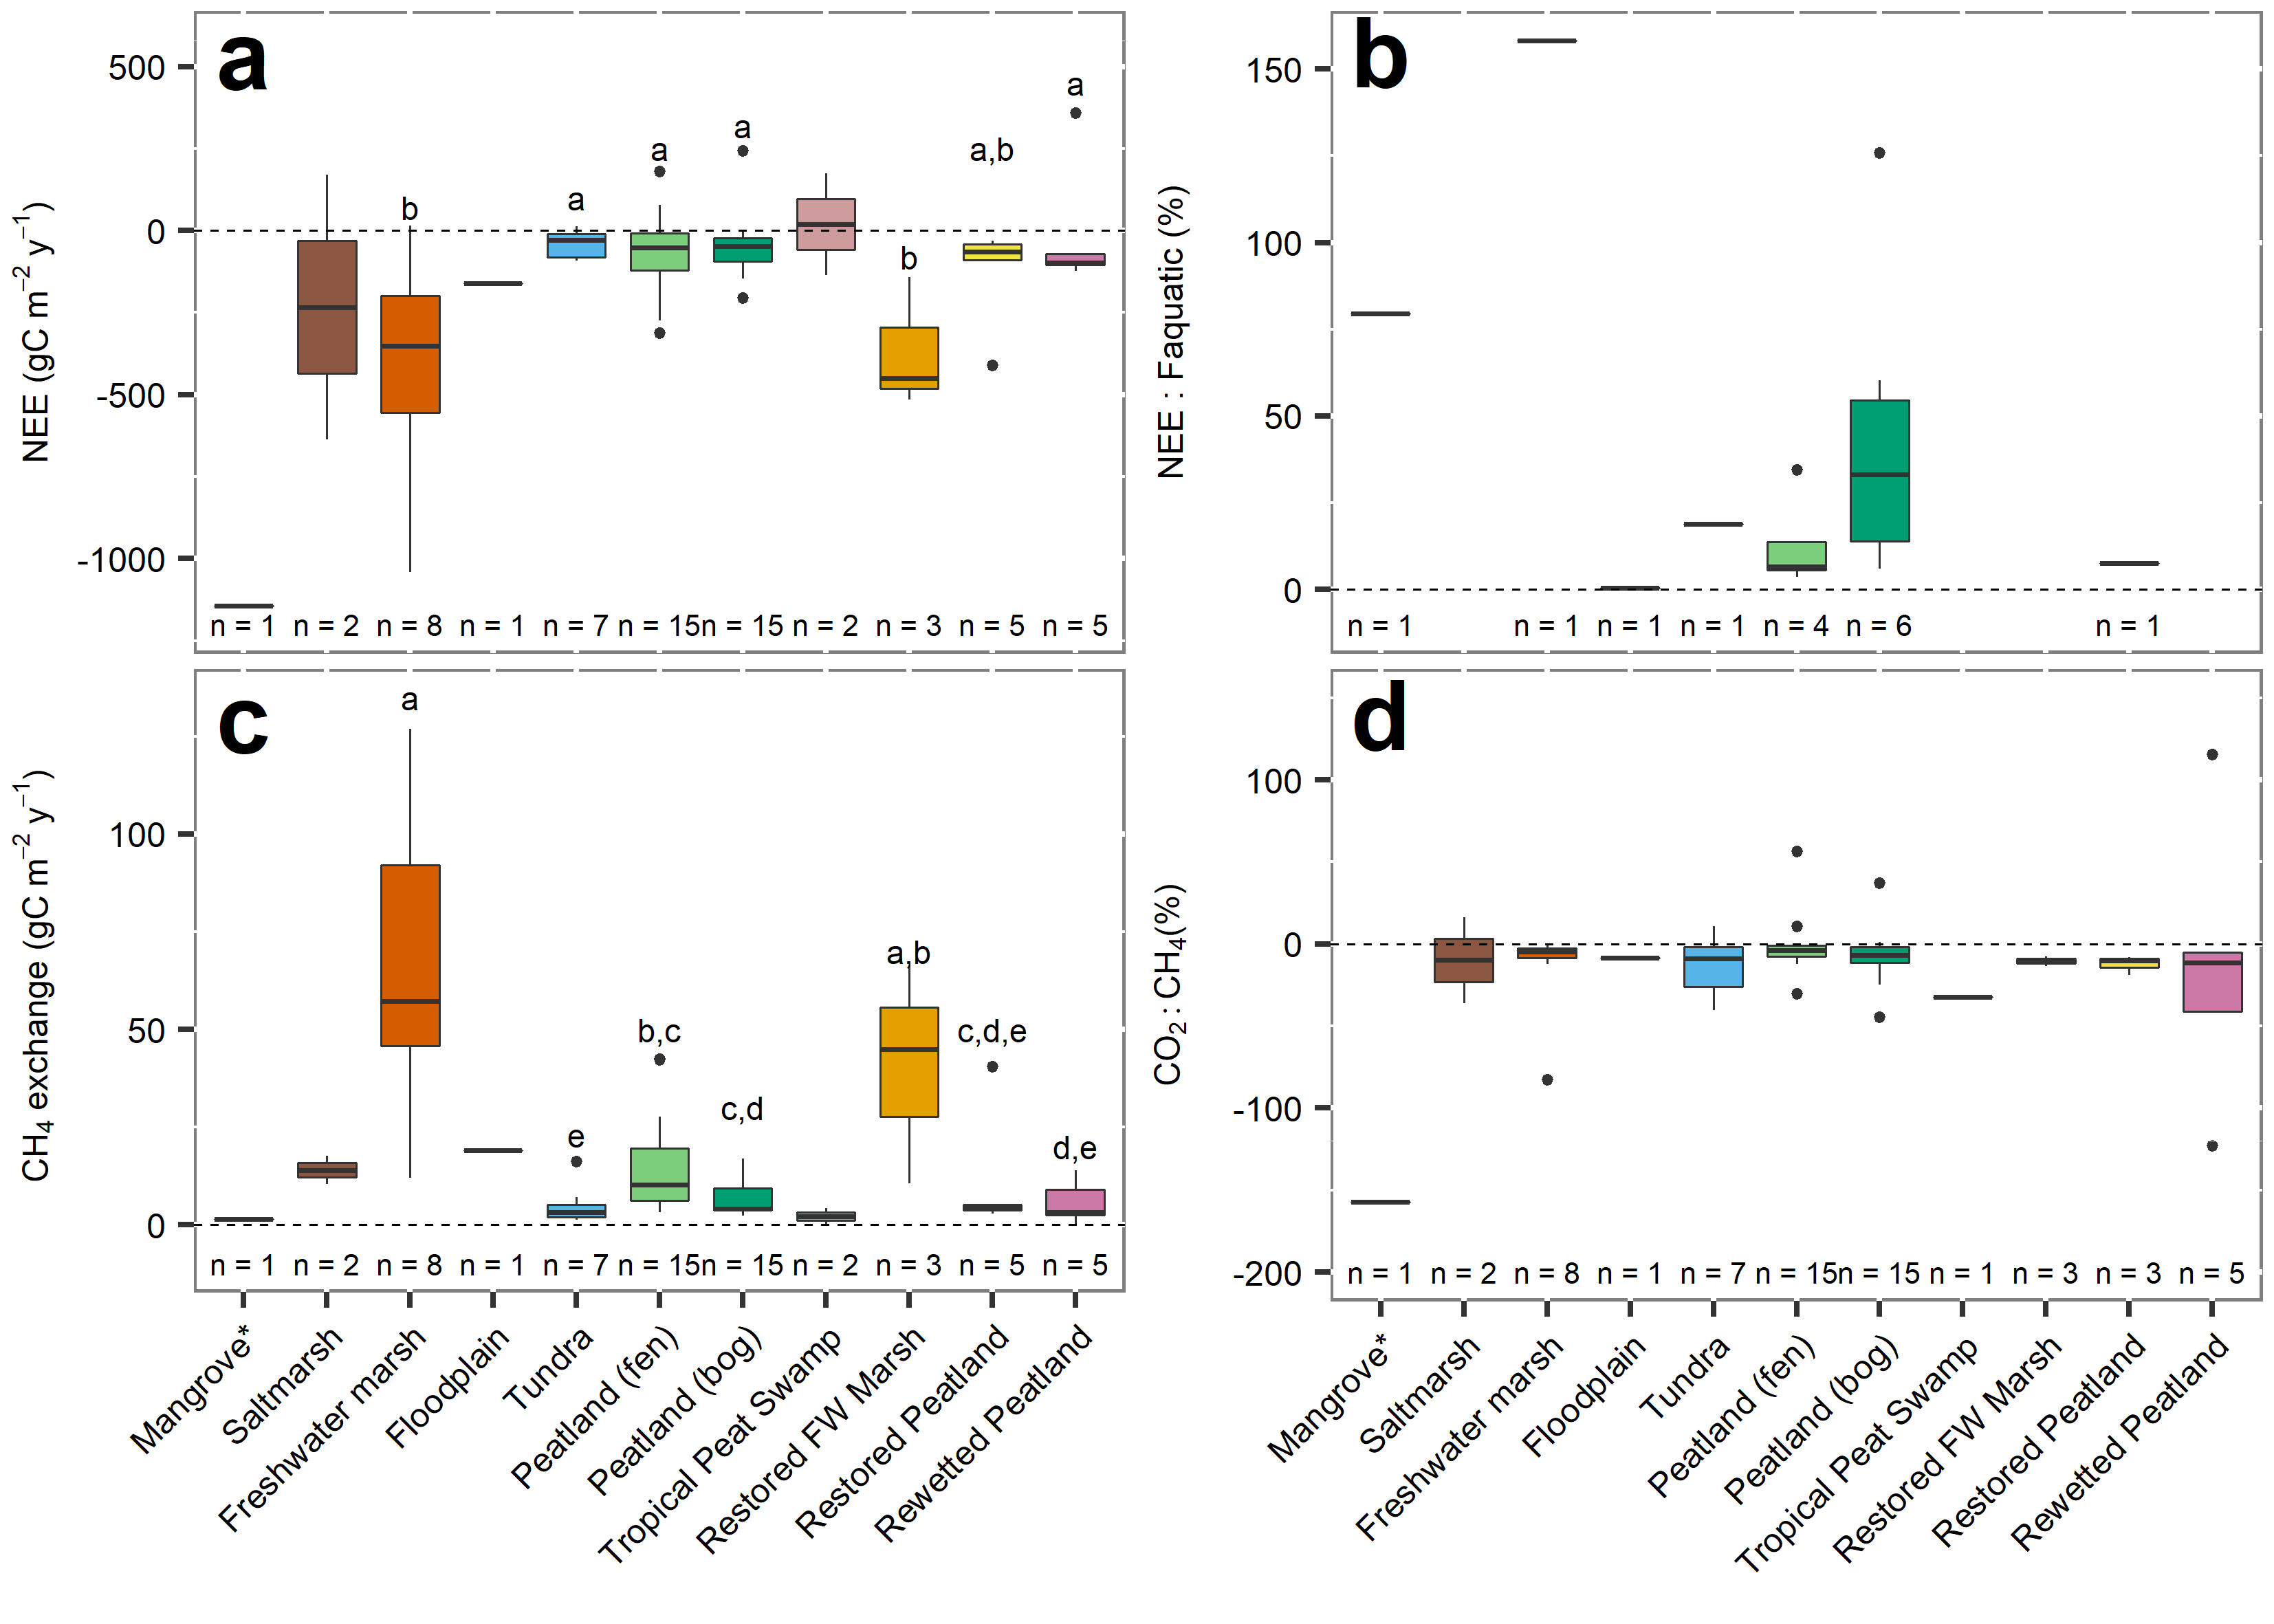


Supplementary Figure 1: Boxplots for mangrove and inland wetlands presenting (a) net ecosystem exchange (NEE); (b) aquatic exchange over NEE; (c) CH4 fluxes; (d) CO2:CH4 ratio (that sums all the CO2 and CH4 inputs and outputs). Boxes span the interquartile range (25-75% quartiles), whiskers 5-95% of observations, horizontal lines are the medians and circle points represent the outliers. Letters indicate significant differences between wetlands when n>2 (non-parametric Van de Warden Test, p<0.05). *Value for mangrove is not from a particular study site but from a global synthesis from ([10](#_ENREF_10)).

**Supplementary references**

1. Corlett RT. Trouble with the gray literature. Biotropica. 2011;43(1):3-5.

2. Webb JR, Santos IR, Maher DT, Finlay K. The Importance of Aquatic Carbon Fluxes in Net Ecosystem Carbon Budgets: A Catchment-Scale Review. Ecosystems. 2018;22(3):508-27.

3. Petrescu AMR, Lohila A, Tuovinen J-P, Baldocchi DD, Desai AR, Roulet NT, et al. The uncertain climate footprint of wetlands under human pressure. Proceedings of the National Academy of Sciences. 2015;112(15):4594-9.

4. Hemes KS, Chamberlain SD, Eichelmann E, Knox SH, Baldocchi DD. A Biogeochemical Compromise: The High Methane Cost of Sequestering Carbon in Restored Wetlands. Geophysical Research Letters. 2018;45(12):6081-91.

5. Chapin FS, Woodwell GM, Randerson JT, Rastetter EB, Lovett GM, Baldocchi DD, et al. Reconciling carbon-cycle concepts, terminology, and methods. Ecosystems. 2006;9(7):1041-50.

6. Neubauer SC, Megonigal JP. Moving Beyond Global Warming Potentials to Quantify the Climatic Role of Ecosystems. Ecosystems. 2015;18(6):1000-13.

7. Bayraktarov E, Saunders MI, Abdullah S, Mills M, Beher J, Possingham HP, et al. The cost and feasibility of marine coastal restoration. Ecological Applications. 2014;26(4):1055-74.

8. Feenstra RC, Inklaar R, Timmer MP. The next generation of the Penn World Table. American economic review. 2015;105(10):3150-82.

9. Bank TW. Wrold Development Indicators. Washington, D.C., USA2019.

10. Rosentreter JA, Maher DT, Erler DV, Murray RH, Eyre BD. Methane emissions partially offset “blue carbon” burial in mangroves. Science Advances. 2018;4(6):eaao4985.

11. Holm GO, Perez BC, McWhorter DE, Krauss KW, Johnson DJ, Raynie RC, et al. Ecosystem level methane fluxes from tidal freshwater and brackish marshes of the Mississippi River Delta: Implications for coastal wetland carbon projects. Wetlands. 2016;36(3):401-13.

12. Krauss KW, Holm Jr GO, Perez BC, McWhorter DE, Cormier N, Moss RF, et al. Component greenhouse gas fluxes and radiative balance from two deltaic marshes in Louisiana: Pairing chamber techniques and eddy covariance. Journal of Geophysical Research: Biogeosciences. 2016;121(6):1503-21.

13. Li H, Dai S, Ouyang Z, Xie X, Guo H, Gu C, et al. Multi-scale temporal variation of methane flux and its controls in a subtropical tidal salt marsh in eastern China. Biogeochemistry. 2018;137(1-2):163-79.

14. Shoemaker W, Barr J, Botkin D, Graham S. Carbon exchange between the atmosphere and subtropical forested cypress and pine wetlands. Biogeosciences Discussions. 2014;11(11).

15. Whiting GJ, Chanton JP. Greenhouse carbon balance of wetlands: methane emission versus carbon sequestration. Tellus B. 2001;53(5):521-8.

16. Herbert ER, Schubauer-Berigan J, Craft CB. Differential effects of chronic and acute simulated seawater intrusion on tidal freshwater marsh carbon cycling. Biogeochemistry. 2018:1-18.

17. Chu H, Gottgens JF, Chen J, Sun G, Desai AR, Ouyang Z, et al. Climatic variability, hydrologic anomaly, and methane emission can turn productive freshwater marshes into net carbon sources. Global change biology. 2015;21(3):1165-81.

18. Strachan IB, Nugent KA, Crombie S, Bonneville M-C. Carbon dioxide and methane exchange at a cool-temperate freshwater marsh. Environmental Research Letters. 2015;10(6):065006.

19. Song C, Sun L, Huang Y, Wang Y, Wan Z. Carbon exchange in a freshwater marsh in the Sanjiang Plain, northeastern China. Agricultural and forest meteorology. 2011;151(8):1131-8.

20. Kiew F, Hirata R, Hirano T, Wong GX, Aeries EB, Musin KK, et al. CO2 balance of a secondary tropical peat swamp forest in Sarawak, Malaysia. Agricultural and Forest Meteorology. 2018;248:494-501.

21. Wong GX, Hirata R, Hirano T, Kiew F, Aeries EB, Musin KK, et al. How do land use practices affect methane emissions from tropical peat ecosystems? Agricultural and Forest Meteorology. 2020;282-283:107869.

22. Sakabe A, Itoh M, Hirano T, Kusin K. Ecosystem‐scale methane flux in tropical peat swamp forest in Indonesia. Global change biology. 2018;24(11):5123-36.

23. Hirano T, Segah H, Kusin K, Limin S, Takahashi H, Osaki M. Effects of disturbances on the carbon balance of tropical peat swamp forests. Global Change Biology. 2012;18(11):3410-22.

24. Dalmagro HJ, de Arruda PH, Vourlitis GL, Lathuillière MJ, de S. Nogueira J, Couto EG, et al. Radiative forcing of methane fluxes offsets net carbon dioxide uptake for a tropical flooded forest. Global change biology. 2019.

25. Taylor M, Celis G, Ledman J, Bracho R, Schuur E. Methane efflux measured by eddy covariance in Alaskan upland tundra undergoing permafrost degradation. Journal of Geophysical Research: Biogeosciences. 2018;123(9):2695-710.

26. Merbold L, Kutsch WL, Corradi C, Kolle O, Rebmann C, Stoy PC, et al. Artificial drainage and associated carbon fluxes (CO2/CH4) in a tundra ecosystem. Global Change Biology. 2009;15(11):2599-614.

27. van der Molen MK, van Huissteden J, Parmentier FJW, Petrescu AMR, Dolman AJ, Maximov TC, et al. The growing season greenhouse gas balance of a continental tundra site in the Indigirka lowlands, NE Siberia. Biogeosciences. 2007;4(6):985-1003.

28. Raz‐Yaseef N, Torn MS, Wu Y, Billesbach DP, Liljedahl AK, Kneafsey TJ, et al. Large CO2 and CH4 emissions from polygonal tundra during spring thaw in northern Alaska. Geophysical Research Letters. 2017;44(1):504-13.

29. Kutzbach L, Schneider J, Sachs T, Giebels M, Nykänen H, Shurpali N, et al. CO 2 flux determination by closed-chamber methods can be seriously biased by inappropriate application of linear regression. 2007.

30. Wille C, Kutzbach L, Sachs T, Wagner D, PFEIFFER EM. Methane emission from Siberian arctic polygonal tundra: eddy covariance measurements and modeling. Global Change Biology. 2008;14(6):1395-408.

31. Tagesson T, Mölder M, Mastepanov M, Sigsgaard C, Tamstorf MP, Lund M, et al. Land‐atmosphere exchange of methane from soil thawing to soil freezing in a high‐A rctic wet tundra ecosystem. Global Change Biology. 2012;18(6):1928-40.

32. Parmentier F, Van Der Molen M, Van Huissteden J, Karsanaev S, Kononov A, Suzdalov D, et al. Longer growing seasons do not increase net carbon uptake in the northeastern Siberian tundra. Journal of Geophysical Research: Biogeosciences. 2011;116(G4).

33. Parmentier F, Van Huissteden J, Van Der Molen M, Schaepman‐Strub G, Karsanaev S, Maximov T, et al. Spatial and temporal dynamics in eddy covariance observations of methane fluxes at a tundra site in northeastern Siberia. Journal of Geophysical Research: Biogeosciences. 2011;116(G3).

34. Goodrich JP, Campbell DI, Schipper LA. Southern Hemisphere bog persists as a strong carbon sink during droughts. 2017.

35. Ueyama M, Yazaki T, Hirano T, Futakuchi Y, Okamura M. Environmental controls on methane fluxes in a cool temperate bog. Agricultural and Forest Meteorology. 2020;281:107852.

36. Roulet NT, Lafleur PM, Richard PJ, Moore TR, Humphreys ER, Bubier J. Contemporary carbon balance and late Holocene carbon accumulation in a northern peatland. Global Change Biology. 2007;13(2):397-411.

37. Olson D, Griffis T, Noormets A, Kolka R, Chen J. Interannual, seasonal, and retrospective analysis of the methane and carbon dioxide budgets of a temperate peatland. Journal of Geophysical Research: Biogeosciences. 2013;118(1):226-38.

38. Drollinger S, Maier A, Glatzel S. Interannual and seasonal variability in carbon dioxide and methane fluxes of a pine peat bog in the Eastern Alps, Austria. Agricultural and Forest Meteorology. 2019;275:69-78.

39. Hommeltenberg J. Biosphere-Atmosphere Exchange of CO2 and CH4 over Natural and Drained Bog Forest Ecosystems in Southern Germany: Technische Universität München; 2014.

40. Strack M, Zuback Y. Annual carbon balance of a peatland 10 yr following restoration. Biogeosciences. 2013;10(5):2885-96.

41. Wang M, Wu J, Lafleur PM, Luan J. Investigation of the climatological impacts of agricultural management and abandonment on a boreal bog in western Newfoundland, Canada. Science of The Total Environment. 2020;711:134632.

42. Euskirchen ES, Edgar C, Turetsky M, Waldrop MP, Harden JW. Differential response of carbon fluxes to climate in three peatland ecosystems that vary in the presence and stability of permafrost. Journal of Geophysical Research: Biogeosciences. 2014;119(8):1576-95.

43. D’Acunha B, Morillas L, Black TA, Christen A, Johnson MS. Net ecosystem carbon balance of a peat bog undergoing restoration: integrating CO2 and CH4 fluxes from eddy covariance and aquatic evasion with DOC drainage fluxes. Journal of Geophysical Research: Biogeosciences. 2019.

44. Koehler Ak, Sottocornola M, Kiely G. How strong is the current carbon sequestration of an Atlantic blanket bog? Global Change Biology. 2011;17(1):309-19.

45. Beetz S, Liebersbach H, Glatzel S, Jurasinski G, Buczko U, Höper H. Effects of land use intensity on the full greenhouse gas balance in an Atlantic peat bog. Biogeosciences. 2013;10(2):1067-82.

46. Billett M, Palmer S, Hope D, Deacon C, Storeton‐West R, Hargreaves K, et al. Linking land‐atmosphere‐stream carbon fluxes in a lowland peatland system. Global Biogeochemical Cycles. 2004;18(1).

47. Levy P, Gray A. Greenhouse gas balance of a semi-natural peatbog in northern Scotland. Environmental Research Letters. 2015;10(9):094019.

48. Alm J, Schulman L, Walden J, Nykänen H, Martikainen PJ, Silvola J. Carbon balance of a boreal bog during a year with an exceptionally dry summer. Ecology. 1999;80(1):161-74.

49. Waddington J, Roulet N. Carbon balance of a boreal patterned peatland. Global Change Biology. 2000;6(1):87-97.

50. Pullens J, Sottocornola M, Kiely G, Toscano P, Gianelle D. Carbon fluxes of an alpine peatland in Northern Italy. Agricultural and forest meteorology. 2016;220:69-82.

51. Hendriks D, Van Huissteden J, Dolman A, Van der Molen M. The full greenhouse gas balance of an abandoned peat meadow. Biogeosciences Discussions. 2007;4(1):277-316.

52. Peacock M, Gauci V, Baird A, Burden A, Chapman P, Cumming A, et al. The full carbon balance of a rewetted cropland fen and a conservation-managed fen. Agriculture, Ecosystems & Environment. 2019;269:1-12.

53. Trudeau NC, Garneau M, Pelletier L. Methane fluxes from a patterned fen of the northeastern part of the La Grande river watershed, James Bay, Canada. Biogeochemistry. 2013;113(1-3):409-22.

54. Trudeau NC, Garneau M, Pelletier L. Interannual variability in the CO 2 balance of a boreal patterned fen, James Bay, Canada. Biogeochemistry. 2014;118(1-3):371-87.

55. Fortuniak K, Pawlak W, Bednorz L, Grygoruk M, Siedlecki M, Zieliński M. Methane and carbon dioxide fluxes of a temperate mire in Central Europe. Agricultural and Forest Meteorology. 2017;232:306-18.

56. Hanis KL, Amiro BD, Tenuta M, Papakyriakou T, Swystun KA. Carbon exchange over four growing seasons for a subarctic sedge fen in northern Manitoba, Canada. Arctic Science. 2015;1(2):27-44.

57. Rinne J, Tuittila ES, Peltola O, Li X, Raivonen M, Alekseychik P, et al. Temporal variation of ecosystem scale methane emission from a boreal fen in relation to temperature, water table position, and carbon dioxide fluxes. Global Biogeochemical Cycles. 2018;32(7):1087-106.

58. Gažovič M, Forbrich I, Jager DF, Kutzbach L, Wille C, Wilmking M. Hydrology-driven ecosystem respiration determines the carbon balance of a boreal peatland. Science of The Total Environment. 2013;463-464:675-82.

59. Nilsson M, Sagerfors J, Buffam I, Laudon H, Eriksson T, Grelle A, et al. Contemporary carbon accumulation in a boreal oligotrophic minerogenic mire–a significant sink after accounting for all C‐fluxes. Global Change Biology. 2008;14(10):2317-32.

60. Drewer J, Lohila A, Aurela M, Laurila T, Minkkinen K, Penttilä T, et al. Comparison of greenhouse gas fluxes and nitrogen budgets from an ombotrophic bog in Scotland and a minerotrophic sedge fen in Finland. European Journal of Soil Science. 2010;61(5):640-50.

61. Christensen TR, Jackowicz-Korczyński M, Aurela M, Crill P, Heliasz M, Mastepanov M, et al. Monitoring the Multi-Year Carbon Balance of a Subarctic Palsa Mire with Micrometeorological Techniques. AMBIO. 2012;41(3):207-17.

62. Jammet M, Dengel S, Kettner E, Parmentier F-JW, Wik M, Crill P, et al. Year-round CH4 and CO2 flux dynamics in two contrasting freshwater ecosystems of the subarctic. 2017.

63. Kittler F, Heimann M, Kolle O, Zimov N, Zimov S, Göckede M. Long‐Term Drainage Reduces CO2 Uptake and CH4 Emissions in a Siberian Permafrost Ecosystem. Global Biogeochemical Cycles. 2017;31(12):1704-17.

64. Juutinen S, Väliranta M, Kuutti V, Laine A, Virtanen T, Seppä H, et al. Short‐term and long‐term carbon dynamics in a northern peatland‐stream‐lake continuum: A catchment approach. Journal of Geophysical Research: Biogeosciences. 2013;118(1):171-83.

65. Christensen TR, Friborg T, Sommerkorn M, Kaplan J, Illeris L, Søgaard H, et al. Trace gas exchange in a high‐Arctic valley: 1. Variationsin CO2 and CH4 Flux between tundra vegetation types. Global Biogeochemical Cycles. 2000;14(3):701-13.

66. Chamberlain SD, Anthony TL, Silver WL, Eichelmann E, Hemes KS, Oikawa PY, et al. Soil properties and sediment accretion modulate methane fluxes from restored wetlands. Global Change Biology. 2018;24(9):4107-21.

67. Nugent KA, Strachan IB, Strack M, Roulet NT, Rochefort L. Multi‐year net ecosystem carbon balance of a restored peatland reveals a return to carbon sink. Global change biology. 2018;24(12):5751-68.

68. Creevy AL, Payne RJ, Andersen R, Rowson JG. Annual gaseous carbon budgets of forest-to-bog restoration sites are strongly determined by vegetation composition. Science of The Total Environment. 2020;705:135863.

69. Strack M, Keith AM, Xu B. Growing season carbon dioxide and methane exchange at a restored peatland on the Western Boreal Plain. Ecological Engineering. 2014;64:231-9.

70. Beyer C, Höper H. Greenhouse gas exchange of rewetted bog peat extraction sites and a Sphagnum cultivation site in northwest Germany. Biogeosciences. 2015;12(7):2101-17.

71. Wilson D, Farrell CA, Fallon D, Moser G, Müller C, Renou‐Wilson F. Multiyear greenhouse gas balances at a rewetted temperate peatland. Global change biology. 2016;22(12):4080-95.

72. Herbst M, Friborg T, Schelde K, Jensen R, Ringgaard R, Thomsen AG, et al. Climate and site management as driving factors for the atmospheric greenhouse gas exchange of a restored wetland. Biogeosciences. 2013;10:39-52.

1. One-off restoration events were recorded as occurring for 1 year, and any unspecified events were clarified with the relevant corresponding authors. [↑](#footnote-ref-1)
2. Most studies in our sample only reported capital costs (e.g. land acquisition and one-off restoration activities). Only one study reported ongoing operation costs (e.g. maintenance), while 10 reported monitoring costs; but since this was not done consistently, such information could not be adequately incorporated into this analysis. [↑](#footnote-ref-2)
